# Supplementary material
Source: Springer Nature journal article supplement (https://www.springermedizin.de/resource/supplementary/12947_2009_250_MOESM7_ESM.pdf/9556596)

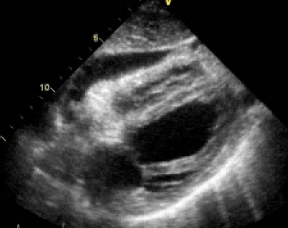

Supplement: MOESM7 [file 9556596]
